# Supplementary material
Source: publisher site journal article supplement (https://en-cdn.bio-protocol.org/attached/file/20210621/4068%20Supplementary%20file%20s1.docx)
Supplement: Supplementary file 1 [file 4068%20Supplementary%20file%20s1.docx]

**Appendix:** Construction of HIV-1 Nef and Btk expression vectors for BiFC.

**Nucleotide and amino acid sequences of the Nef-VN fusion construct.** The N-terminal coding region of the Venus form of YFP (amino acids Gly2 to Asp173) was amplified first. The 5’ PCR primer encoded an EcoRI site, followed by the 3’ end of the Nef sequence just upstream of the unique BspE1 site shown, and finally the first six codons of Venus. The 3’ primer consisted of the sequence complementary to the last six codons of the Venus VN fragment, followed by a seven amino acid spacer, an HA tag, stop codon and BamHI site. The PCR product was digested with EcoRI and BamHI, and subcloned into pCDNA3.1(-). Next, the Nef sequence was amplified with a 5’ primer consisting of an EcoRI site, consensus Kozak sequence (GCC ACC), and the first six codons of HIV-1 Nef (SF2 allele). The reverse primer encoded the sequence complementary to the last six codons of Nef, downstream of the unique BspE1 site. The PCR product was digested with EcoRI and BspE1 and ligated to the intermediate pCDNA3.1-VN vector following digestion with the same enzymes to create the Nef-VN fusion construct shown.

**Nucleotide and amino acid sequences of the Btk-VC fusion construct.** The C-terminal coding region of the Venus form of YFP (amino acids Ala154 to Lys238) was amplified with a 5’ PCR primer encoding a KpnI site, followed by six codons of Venus beginning at Ala154. The 3’ primer consisted of the sequence complementary to the last six codons of the Venus VC fragment, followed by a stop codon and a unique PmeI site. The PCR product was digested with KpnI and PmeI and subcloned into pCDNA3.1(-) via these two sites. Next, the human Btk cDNA sequence was amplified with a 5’ primer consisting of a NotI site, a consensus Kozak sequence (GCC ACC), and the first six codons of Btk. The reverse primer encoded the sequence complementary to the last six codons of Btk, followed by the coding sequence for the V5 epitope tag, and a Kpn I site. The Btk PCR product was digested with NotI and KpnI and ligated to the intermediate pCDNA3.1-VC vector following digestion with the same two enzymes to create the Btk-V5-VC fusion construct shown. For clarity, the sequence of the center portion of the Btk cDNA sequence is not shown.
